# Supplementary material for: The Impact of a Nitric Oxide Synthase Inhibitor (L-NAME) on Ischemia–Reperfusion Injury of Cholestatic Livers by Pringle Maneuver and Liver Resection after Bile Duct Ligation in Rats
Source: PubMed Central journal article supplement (PMC6539833; doi:10.3390/ijms20092114), 2019-04-29
Supplement: ijms-20-02114-s001.pdf [file ijms-20-02114-s001.pdf]

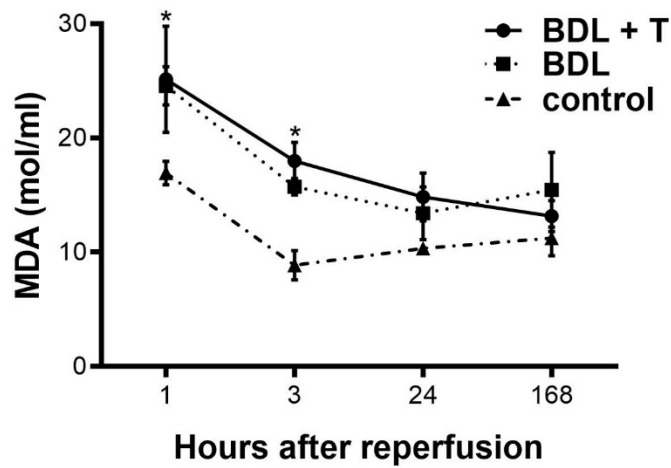

**Supplemental Figure 1.** To estimate the oxygen free radical activity in the liver, lipid peroxidation in serum was determined by malondialdehyde (MDA) measurements at 1, 3, 24, and 168 h after reperfusion. Mean and standard deviation are shown in each group. Mean and standard deviation are shown in each group with significance levels of  $*p < 0.05$ .

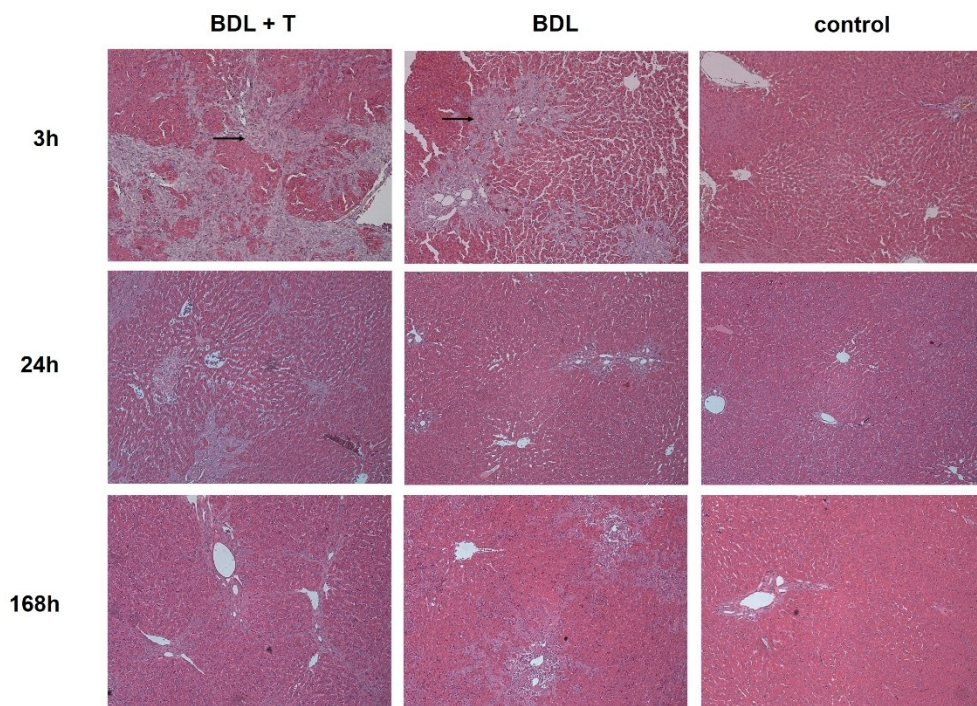

**Supplemental Figure 2.** Representative images showing HE stained liver sections at indicated time points and the treatment groups BDL + T, BDL<sub>s</sub> and control (100x). Arrows mark fibrous connective tissue.
